# Supplementary material for: Selection of reference genes for RT-qPCR studies in blood of beluga whales (Delphinapterus leucas)
Source: PeerJ. 2016 Mar 15;4:e1810. doi: 10.7717/peerj.1810 (PMC4797766; doi:10.7717/peerj.1810)
Supplement: Supplemental Information 1 [file peerj-04-1810-s001.xls]

## Sheet: Sheet1
															effi	1.9769	1.9581	1.9703	1.9817	2.0049	1.9547	1.9655	1.9691	2.0139	1.9846	1.9896	1.9779	1.9835
effi	1.9769	1.9581	1.9703	1.9817	2.0049	1.9547	1.9655	1.9691	2.0139	1.9846	1.9896	1.9779	1.9835		min	20.6634	21.3423	21.8625	29.7099	25.1216	26.2282	22.975	23.6712	22.993	22.3599	23.5696	28.4721	23.549		min	20.6634	21.3423	21.8625	29.7099	25.1216	26.2282	22.975	23.6712	22.993	22.3599	23.5696	28.4721	23.549
	ACTB	B2M	GAPDH	HPRT1	LDHB	PGK1	RPL18	RPL4	RPL8	RPS18	RPS9	TFRC	YWHAZ			ACTB	B2M	GAPDH	HPRT1	LDHB	PGK1	RPL18	RPL4	RPL8	RPS18	RPS9	TFRC	YWHAZ			ACTB	B2M	GAPDH	HPRT1	LDHB	PGK1	RPL18	RPL4	RPL8	RPS18	RPS9	TFRC	YWHAZ
Angel111207	21.4773	21.8048	23.5212	31.3369	26.0462	26.8336	24.1809	24.6638	23.6043	23.106	24.972	31.4276	24.5078		Angel111207	0.574249	0.732867	0.324678	0.328656	0.525644	0.666439	0.442708	0.510421	0.651828	0.599644	0.381075	0.133216	0.518566		Angel111207	21.4636	21.7907	23.4854	31.3153	26.0494	26.8136	24.1506	24.6415	23.6104	23.0977	24.9615	31.3802	24.4964
Angel120110	21.732	22.2148	24.1343	31.6338	26.8488	27.679	24.214	25.0773	24.0406	23.742	25.5807	31.6055	25.5376		Angel120110	0.482729	0.556396	0.214232	0.268248	0.300773	0.378169	0.432913	0.385689	0.480291	0.38777	0.25071	0.117994	0.256162		Angel120110	21.7141	22.1881	24.0853	31.6083	26.8548	27.6311	24.1829	25.0457	24.051	23.7266	25.5655	31.5553	25.5139
Angel120911	22.3853	22.8668	23.7602	32.7471	26.537	27.8784	24.2514	25.6135	24.3729	23.9634	25.0797	31.8398	26.2528		Angel120911	0.309276	0.359	0.276097	0.125274	0.373601	0.330858	0.422106	0.268194	0.380597	0.333161	0.353877	0.100566	0.156967		Angel120911	22.3564	22.8203	23.7193	32.7068	26.542	27.8239	24.2194	25.5699	24.3867	23.9456	25.0683	31.7859	26.2205
Angel120214	22.5059	22.7479	24.1348	32.3993	27.6249	28.3569	25.3964	25.6853	25.0834	24.6023	26.0883	31.9899	26.155		Angel120214	0.284869	0.388863	0.214154	0.158913	0.175296	0.240081	0.194708	0.255465	0.231442	0.215019	0.176806	0.0907841	0.167835		Angel120214	22.475	22.705	24.0858	32.3636	27.6337	28.2866	25.3357	25.64	25.1043	24.5773	26.0694	31.9335	26.1239
Angel120313	23.9812	23.0497	25.7178	34.0462	28.0883	28.9787	25.3635	26.5153	24.8829	24.406	26.7461	33.6335	26.8965		Angel120313	0.104225	0.317476	0.0731949	0.0515204	0.126997	0.158265	0.199098	0.145577	0.266326	0.245983	0.112452	0.0295904	0.101006		Angel120313	23.9256	22.9976	25.6346	33.9886	28.0987	28.8877	25.3035	26.4514	24.9017	24.3832	26.7223	33.5508	26.8565
Angel120410	21.7909	21.8884	23.7785	31.9288	26.3677	28.0192	24.1534	25.0218	24.2377	23.9436	25.5648	31.3893	25.2436		Angel120410	0.463732	0.692855	0.272687	0.219241	0.42031	0.301074	0.450996	0.400478	0.418377	0.337722	0.253462	0.136744	0.313298		Angel120410	21.772	21.8717	23.7372	31.8993	26.3721	27.96	24.1239	24.9914	24.2501	23.9259	25.5498	31.3425	25.2234
Angel120515	22.1015	22.2795	23.1138	31.7621	26.336	27.7018	23.6024	24.9673	23.9194	23.5243	24.0953	30.6041	24.8746		Angel120515	0.375267	0.532708	0.428011	0.245713	0.429668	0.372426	0.654475	0.415547	0.522822	0.450161	0.696541	0.233603	0.403398		Angel120515	22.0774	22.2509	23.0868	31.7349	26.3403	27.6531	23.5866	24.9381	23.9286	23.5113	24.0914	30.5699	24.8587
Angel120615	22.0899	22.1931	23.4793	31.4242	25.7098	27.4676	23.3549	25.0563	23.4192	23.0614	24.3416	30.9784	25.0735		Angel120615	0.378232	0.564544	0.334036	0.309609	0.66423	0.435738	0.773619	0.391228	0.742009	0.618268	0.587992	0.180973	0.352023		Angel120615	22.066	22.1672	23.4444	31.4014	25.7118	27.4266	23.3454	25.0252	23.4235	23.0535	24.3358	30.9382	25.0552
Angel120618	22.7788	23.1338	24.0208	32.4867	26.2383	27.9233	23.9302	25.5301	23.9298	23.4407	24.8944	31.4366	26.1923		Angel120618	0.236525	0.300044	0.231381	0.149695	0.459889	0.321047	0.524446	0.283785	0.519007	0.476732	0.401972	0.132404	0.163607		Angel120618	22.7433	23.0791	23.9742	32.4498	26.2422	27.8673	23.9062	25.4884	23.9392	23.4286	24.8845	31.3891	26.1607
Angel121017	21.562	21.9796	22.9941	29.9622	25.9317	27.5238	23.4978	24.212	23.9121	23.37	24.0224	29.3231	24.571		Angel121017	0.542047	0.651635	0.464194	0.841517	0.569226	0.419622	0.702406	0.693214	0.525492	0.500397	0.732358	0.559665	0.496624		Angel121017	21.5469	21.9602	22.9697	29.9589	25.9345	27.481	23.4847	24.1999	23.9213	23.3587	24.019	29.3094	24.5588
Angel130109	21.8014	22.0372	22.7076	31.0016	27.1129	27.416	24.2396	25.0769	24.3578	23.9311	24.2337	30.3252	24.4933		Angel130109	0.460444	0.626924	0.56375	0.413367	0.250281	0.451056	0.425485	0.385804	0.384635	0.340624	0.633285	0.282552	0.523769		Angel130109	21.7823	22.0159	22.6894	30.9844	27.12	27.3768	24.2079	25.0453	24.3714	23.9136	24.2287	30.2955	24.482
Angel130204	22.2687	22.226	23.0709	31.3027	27.1487	27.3851	24.1777	24.9451	24.7055	24.0863	24.3451	30.9626	24.4515		Angel130204	0.334842	0.552229	0.440648	0.336419	0.244137	0.460521	0.443664	0.42184	0.301526	0.306263	0.586557	0.182936	0.538982		Angel130204	22.2418	22.199	23.0448	31.2816	27.1558	27.3468	24.1475	24.9165	24.7227	24.067	24.3393	30.9227	24.4407
Angel130313	21.2364	21.3902	22.1398	29.7724	26.2789	26.4567	23.4056	24.0667	23.668	23.1089	23.5696	29.4831	23.7079		Angel130313	0.6767	0.968321	0.828586	0.958196	0.447081	0.857957	0.747544	0.764917	0.623415	0.59845	1	0.501804	0.89689		Angel130313	21.2268	21.3888	22.1338	29.7715	26.283	26.4492	23.3948	24.0579	23.6747	23.1006	23.5696	29.4669	23.706
Angel130410	21.0171	21.3423	21.8638	29.806	26.2832	26.5002	23.513	24.2158	23.7732	23.422	23.6468	29.8659	23.8391		Angel130410	0.785763	1	0.999104	0.936436	0.445742	0.833338	0.695219	0.691441	0.579168	0.48286	0.948323	0.386483	0.819797		Angel130410	21.0112	21.3423	21.8638	29.8047	26.2873	26.4912	23.4995	24.2036	23.781	23.4102	23.6462	29.8436	23.8356
Angel130515	21.9813	21.8651	22.5427	30.9962	26.677	26.9032	23.9973	24.6657	24.2951	23.6	24.193	30.9506	23.972		Angel130515	0.407304	0.703771	0.630487	0.414885	0.338943	0.636075	0.501199	0.509762	0.401892	0.427405	0.651248	0.184435	0.7485		Angel130515	21.9592	21.8491	22.528	30.9792	26.6825	26.8809	23.9716	24.6433	24.3081	23.5862	24.1884	30.9109	23.9669
Babu111207	22.2515	22.2999	23.7506	32.7359	26.8195	28.348	25.0718	25.233	24.1655	23.7936	25.1451	30.9288	26.5948		Babu111207	0.338809	0.525446	0.277901	0.126237	0.306952	0.241525	0.242476	0.347077	0.440059	0.374287	0.338308	0.187196	0.124187		Babu111207	22.2248	22.2707	23.7099	32.6957	26.8255	28.2779	25.0191	25.1979	24.1772	23.7776	25.1332	30.8895	26.5584
Babu120110	21.884	21.7603	23.4228	31.5372	26.2376	28.3752	23.9021	24.9865	24.6064	24.151	25.5453	29.8144	24.548		Babu120110	0.435217	0.75514	0.347087	0.286569	0.460099	0.237162	0.534492	0.41017	0.323198	0.292968	0.256876	0.400319	0.504503		Babu120110	21.8636	21.7475	23.3891	31.513	26.2416	28.3042	23.8788	24.9569	24.6225	24.131	25.5305	29.7928	24.5361
Babu120214	23.6562	23.5113	26.543	32.9278	26.8376	28.9471	24.9215	26.206	24.6613	24.1547	26.8303	32.4193	26.692		Babu120214	0.130071	0.232815	0.0418268	0.11071	0.303114	0.161644	0.268389	0.179515	0.311019	0.292228	0.10613	0.0677352	0.11619		Babu120214	23.606	23.445	26.4419	32.8851	26.8437	28.8573	24.8726	26.1491	24.6779	24.1347	26.8057	32.356	26.6544
Babu120313	22.4239	22.5385	23.8559	31.5367	25.2799	28.0442	23.9293	25.1619	24.4007	24.0605	25.7692	30.1699	25.0561		Babu120313	0.301233	0.447625	0.258754	0.286663	0.895737	0.296059	0.524758	0.364195	0.373247	0.311727	0.220211	0.314129	0.356244		Babu120313	22.3944	22.5019	23.8129	31.5125	25.2804	27.9842	23.9053	25.1284	24.4148	24.0415	25.7527	30.1426	25.038
Babu120410	22.441	22.9307	23.9823	31.8033	26.7887	28.6943	24.326	25.464	24.8432	24.3714	25.8961	30.204	25.5161		Babu120410	0.297753	0.343925	0.2375	0.238882	0.313611	0.191496	0.401361	0.296796	0.273822	0.251901	0.201799	0.306896	0.259969		Babu120410	22.4112	22.8821	23.9365	31.7756	26.7945	28.6128	24.2921	25.4237	24.8617	24.3489	25.8786	30.1763	25.4926
Babu120515	22.8906	23.5099	24.6996	32.5431	27.0489	28.5174	24.7576	26.3805	24.4091	24.3444	25.595	31.3728	25.8365		Babu120515	0.219167	0.233032	0.146014	0.144027	0.261676	0.215601	0.29982	0.1595	0.371079	0.256598	0.248255	0.138287	0.208747		Babu120515	22.8533	23.4437	24.6383	32.5055	27.0557	28.4417	24.7129	26.3196	24.4232	24.3223	25.5797	31.3263	25.8092
Babu120618	22.2395	22.2772	23.0872	30.9168	25.581	27.2539	22.975	24.6986	22.993	22.5633	23.7328	29.1868	24.8816		Babu120618	0.341581	0.533546	0.435816	0.438054	0.72647	0.502842	1	0.498526	1	0.869854	0.893807	0.614189	0.401464		Babu120618	22.2131	22.2486	23.0607	30.9008	25.5826	27.22	22.975	24.6755	22.993	22.561	23.7316	29.1753	24.8656
Babu120807	22.1242	23.0575	23.492	31.9803	26.0916	28.3025	24.1896	25.4512	24.209	23.8681	25.0913	31.0701	25.7905		Babu120807	0.369505	0.315835	0.331176	0.211648	0.509282	0.248997	0.440124	0.29938	0.426872	0.35565	0.351062	0.169998	0.215425		Babu120807	22.0997	23.0051	23.4568	31.9502	26.0951	28.234	24.1591	25.4112	24.2211	23.8513	25.0798	31.0285	25.7637
Babu120911	23.1239	23.349	24.3109	32.4724	26.976	28.5982	24.5643	25.9228	24.6418	24.4025	25.3289	30.8877	26.5808		Babu120911	0.186951	0.25965	0.190055	0.151159	0.275292	0.204237	0.34166	0.217494	0.315284	0.246587	0.298113	0.192528	0.125384		Babu120911	23.0827	23.2877	24.258	32.4358	26.9826	28.5198	24.5244	25.8722	24.6583	24.3797	25.3157	30.8489	26.5446
Babu121221	21.3344	22.0815	21.8868	30.9309	26.7883	26.8107	24.3479	24.8932	24.288	24.0049	24.1959	29.627	24.0615		Babu121221	0.632968	0.608543	0.983669	0.433837	0.313683	0.676751	0.395451	0.436936	0.403903	0.323821	0.649986	0.454897	0.703962		Babu121221	21.3232	22.0589	21.8863	30.9147	26.7942	26.7915	24.3135	24.8657	24.3009	23.9866	24.1912	29.6085	24.0554
Babu121225	22.6178	23.3769	23.8809	32.24	26.6529	27.7962	24.0879	25.6473	25.2924	24.5903	24.9613	31.1575	25.8383		Babu121225	0.263958	0.254828	0.254399	0.177201	0.34468	0.349612	0.47141	0.262132	0.199942	0.216804	0.383893	0.160161	0.208487		Babu121225	22.585	23.3147	23.8373	32.2065	26.6583	27.7443	24.06	25.6029	25.3154	24.5654	24.9509	31.1145	25.811
Babu130103	21.0837	21.6223	21.8625	30.1123	25.9225	26.2282	23.7443	23.9988	23.8091	23.2543	23.9078	29.1816	23.549		Babu130103	0.750899	0.828512	1	0.759416	0.572855	1	0.594645	0.800948	0.564784	0.541685	0.79243	0.61638	1		Babu130103	21.0767	21.6137	21.8625	30.107	25.9254	26.2282	23.7249	23.9915	23.8172	23.2443	23.9053	29.1702	23.549
Babu130109	22.031	21.9237	22.5077	30.8897	26.5254	27.0629	24.1216	24.6632	24.3002	23.8457	24.3718	30.4421	23.9265		Babu130109	0.393728	0.676612	0.645607	0.446243	0.376638	0.57151	0.460803	0.510621	0.400475	0.36116	0.575887	0.260896	0.77215		Babu130109	22.0081	21.9059	22.4938	30.874	26.5303	27.0353	24.0928	24.6409	24.3132	23.8291	24.3658	30.4105	23.922
Babu130204	22.8136	23.0463	23.4055	31.9556	26.9816	27.8973	24.514	25.3358	24.5889	24.2243	24.7445	29.7	25.3256		Babu130204	0.230969	0.318221	0.351188	0.215262	0.274229	0.326693	0.353484	0.323732	0.327174	0.278624	0.445631	0.43279	0.296197		Babu130204	22.7776	22.9942	23.3722	31.9258	26.9881	27.8421	24.4753	25.2984	24.6049	24.2035	24.7357	29.6803	25.3044
Babu130515	22.5099	23.111	23.104	31.7624	27.6858	28.1609	24.558	25.4831	24.0138	24.2609	24.3886	29.1836	25.4225		Babu130515	0.284093	0.304677	0.430878	0.245661	0.16802	0.273785	0.34312	0.292981	0.489369	0.271707	0.569265	0.615536	0.277174		Babu130515	22.4789	23.057	23.0772	31.7352	27.6949	28.097	24.5183	25.4424	24.024	24.2397	24.3825	29.1722	25.4001
Blue111108	22.771	23.2133	24.5173	32.4275	27.4582	28.4346	25.125	25.1866	24.5912	24.0171	25.8388	31.086	26.0273		Blue111108	0.237783	0.284432	0.165224	0.155872	0.196848	0.227906	0.23391	0.358166	0.326657	0.321141	0.209921	0.168169	0.183178		Blue111108	22.7357	23.1562	24.46	32.3915	27.4664	28.3616	25.071	25.1525	24.6072	23.9986	25.8217	31.0441	25.9977
Blue111207	22.2466	22.4372	23.8648	32.263	27.3241	27.8641	24.602	24.9519	24.2729	23.382	25.0379	31.1317	26.2525		Blue111207	0.339943	0.479149	0.257198	0.174435	0.21609	0.334059	0.333066	0.419882	0.408188	0.496293	0.364196	0.163006	0.156996		Blue111207	22.22	22.4038	23.8216	32.2292	27.3319	27.81	24.5612	24.9232	24.2857	23.3706	25.0268	31.0891	26.2202
Blue120111	22.7583	22.5042	24.0533	32.3976	27.8422	28.2352	24.6493	25.3979	24.2282	23.6905	25.3568	30.9202	26.1545		Blue120111	0.239853	0.458059	0.226337	0.159097	0.150702	0.260493	0.3226	0.310392	0.421162	0.401705	0.292461	0.1883	0.167896		Blue120111	22.7232	22.4687	24.006	32.362	27.8518	28.1688	24.6072	25.3591	24.2406	23.6756	25.3433	30.881	26.1233
Blue120214	21.6474	21.8883	23.1856	31.3484	26.401	27.2586	23.5713	24.2828	23.8884	23.2352	24.9321	30.4771	25.0896		Blue120214	0.511376	0.692906	0.40766	0.326077	0.410679	0.501266	0.66839	0.660734	0.534279	0.548812	0.391699	0.254736	0.348151		Blue120214	21.6309	21.8716	23.1571	31.3267	26.4055	27.2245	23.5563	24.2691	23.8973	23.2255	24.9218	30.445	25.0712
Blue120313	21.5458	21.3913	24.7213	32.6766	27.3649	27.3148	25.043	23.8074	24.0865	23.2365	24.4097	33.5879	26.6158		Blue120313	0.548045	0.9676	0.143875	0.131456	0.210048	0.482709	0.24723	0.91184	0.465092	0.548341	0.561069	0.0305249	0.122418		Blue120313	21.531	21.3898	24.6596	32.6373	27.3728	27.2789	24.9911	23.8044	24.0974	23.2267	24.4034	33.5059	26.5791
Blue120410	21.9677	22.6862	23.952	31.7245	26.6725	28.0359	23.9114	25.1061	24.2031	23.6733	25.4048	30.4186	25.1476		Blue120410	0.411098	0.405314	0.242418	0.252111	0.339999	0.297707	0.53113	0.378228	0.42864	0.406457	0.282958	0.265109	0.334604		Blue120410	21.9458	22.6452	23.9069	31.6978	26.678	27.9762	23.8879	25.0739	24.2152	23.6587	25.391	30.3874	25.1285
Blue120515	22.3325	22.4504	23.9127	32.4117	26.7601	28.2251	24.3195	25.0915	24.5605	23.9529	25.6602	31.8432	25.8031		Blue120515	0.320604	0.474934	0.248971	0.157566	0.319902	0.262262	0.403119	0.381993	0.333762	0.335579	0.237364	0.100333	0.21357		Blue120515	22.3045	22.4165	23.8685	32.3759	26.7659	28.1591	24.2858	25.0596	24.5761	23.9351	25.6445	31.7892	25.7762
Blue120618	21.3759	21.68	23.0184	31.4573	26.0237	27.0839	23.7847	24.1538	23.5249	22.9571	24.7377	30.6367	25.0143		Blue120618	0.615345	0.796974	0.456629	0.302666	0.533908	0.563511	0.578618	0.721089	0.689126	0.664095	0.447741	0.228476	0.366572		Blue120618	21.3639	21.6697	22.9934	31.4341	26.0269	27.0556	23.7644	24.143	23.5302	22.9504	24.7289	30.602	24.9968
Blue120807	22.1334	22.5241	23.614	31.3596	25.7705	27.6578	23.1421	24.5023	23.6908	22.877	24.1741	30.7661	25.291		Blue120807	0.367191	0.451984	0.304887	0.323584	0.636732	0.383575	0.893232	0.569445	0.613537	0.701564	0.659799	0.209176	0.303295		Blue120807	22.1088	22.488	23.5762	31.3377	25.7728	27.6106	23.1379	24.4836	23.6978	22.8712	24.1695	30.7293	25.2702
Blue120911	21.5236	22.2264	23.0573	31.2242	25.7957	27.1291	23.0791	23.9762	23.4097	22.818	23.9704	29.5292	25.057		Blue120911	0.556387	0.552079	0.444738	0.354983	0.625704	0.546717	0.932127	0.813319	0.747006	0.730497	0.759055	0.486282	0.356006		Blue120911	21.5092	22.1994	23.0315	31.2041	25.798	27.0993	23.0764	23.9693	23.4138	22.8129	23.9674	29.5122	25.039
Blue121017	21.6183	22.396	22.8311	29.7394	26.6825	27.3844	23.1439	24.1159	23.7331	23.3318	23.7795	28.4721	24.6626		Blue121017	0.521644	0.492592	0.518457	0.980052	0.337656	0.460715	0.892158	0.739856	0.595653	0.513651	0.865552	1	0.466404		Blue121017	21.6022	22.3638	22.8102	29.739	26.688	27.3462	23.1397	24.1059	23.7405	23.321	23.7779	28.4721	24.6493
Blue121107	21.5798	22.1108	22.1277	29.9237	26.863	26.9853	23.7332	24.0624	23.959	23.1951	23.5999	29.5535	24.1987		Blue121107	0.535497	0.59665	0.835416	0.863966	0.297805	0.602016	0.599111	0.767193	0.508507	0.564132	0.97939	0.478276	0.64085		Blue121107	21.5644	22.0874	22.1219	29.9209	26.8692	26.9603	23.7142	24.0536	23.9687	23.1857	23.5997	29.5362	24.1909
Blue121212	22.0417	22.0342	22.3071	30.5277	27.0293	27.048	23.5233	24.3753	24.2091	23.3393	23.8208	30.1986	24.3755		Blue121212	0.390882	0.628189	0.739703	0.571588	0.265279	0.577226	0.690392	0.620601	0.426838	0.511042	0.841314	0.308039	0.56775		Blue121212	22.0186	22.013	22.2975	30.5169	27.036	27.0209	23.5096	24.3595	24.2212	23.3283	23.8189	30.1709	24.3657
Blue130410	21.2449	21.6576	22.1798	29.7099	26.4181	26.5412	23.2755	24.274	23.9848	23.1686	23.7034	29.1367	24.0572		Blue130410	0.672788	0.809063	0.806419	1	0.405814	0.810726	0.816252	0.664703	0.499419	0.57446	0.91207	0.635537	0.706077		Blue130410	21.2352	21.648	22.1729	29.7099	26.4227	26.5309	23.268	24.2605	23.9947	23.1596	23.7024	29.126	24.0511
Blue130515	22.2979	22.2498	22.8963	31.2172	26.3588	27.0713	23.243	24.1906	23.985	23.099	23.7435	29.7199	24.6433		Blue130515	0.328258	0.543437	0.496043	0.35669	0.422908	0.568318	0.83436	0.703345	0.499341	0.60253	0.887253	0.426947	0.472634		Blue130515	22.2705	22.2221	22.874	31.1972	26.3632	27.0434	23.2363	24.1789	23.9949	23.0907	23.7422	29.6999	24.6302
Gimbo111108	22.3309	22.7805	24.1512	31.9193	27.228	27.915	25.4058	25.3557	24.7332	23.9292	25.5385	31.9607	25.8741		Gimbo111108	0.320949	0.380438	0.211794	0.220661	0.231026	0.322838	0.193485	0.319392	0.295743	0.341067	0.258088	0.0926065	0.203437		Gimbo111108	22.303	22.7366	24.1018	31.89	27.2355	27.8593	25.3447	25.3178	24.7506	23.9117	25.5237	31.9048	25.8463
Gimbo111207	22.7298	22.126	25.0285	32.3487	25.9491	28.353	25.0261	24.866	25.0878	23.8339	25.189	33.5106	25.961		Gimbo111207	0.244546	0.590615	0.116815	0.164511	0.562358	0.240717	0.250082	0.445067	0.230732	0.364107	0.328239	0.0321795	0.19168		Gimbo111207	22.6952	22.102	24.9602	32.3137	25.952	28.2827	24.9746	24.8391	25.1087	23.8174	25.1768	33.4298	25.9322
Gimbo120110	20.6634	21.6827	22.9963	30.8728	26.1868	26.2902	23.2586	23.6712	23.3386	22.3599	24.2292	31.2486	24.4269		Gimbo120110	1	0.795519	0.463518	0.451418	0.476673	0.959247	0.825639	1	0.785076	1	0.635231	0.150516	0.548133		Gimbo120110	20.6634	21.6723	22.9718	30.8574	26.1905	26.2882	23.2515	23.6712	23.3421	22.3599	24.2243	31.2041	24.4164
Gimbo120214	21.2377	21.4529	22.175	31.3075	25.6036	28.3646	24.3835	24.3301	25.4649	24.7337	24.6095	30.9985	24.3978		Gimbo120214	0.676078	0.92837	0.809011	0.335324	0.715143	0.238841	0.386064	0.639894	0.1772	0.196497	0.489019	0.178514	0.559162		Gimbo120214	21.2281	21.4495	22.1683	31.2863	25.6053	28.294	24.3481	24.3153	25.4896	24.7073	24.6017	30.958	24.3876
Gimbo120313	23.7282	23.5562	25.106	33.7759	28.1085	29.1152	25.7082	26.2277	25.3447	24.653	26.3515	32.9641	27.6421		Gimbo120313	0.123843	0.225891	0.110834	0.0619818	0.125218	0.14442	0.157725	0.176899	0.192745	0.207673	0.147525	0.0467135	0.0606161		Gimbo120313	23.6768	23.4886	25.036	33.7219	28.1191	29.0198	25.6396	26.1702	25.3682	24.6275	26.3306	32.8921	27.5931
Gimbo120410	22.5639	22.9611	24.0954	31.5749	27.0611	28.564	24.9066	25.8108	25.1471	24.3602	25.7379	31.4711	25.3742		Gimbo120410	0.273827	0.336953	0.219962	0.279269	0.259472	0.208964	0.2711	0.234633	0.221344	0.253835	0.225004	0.129325	0.286504		Gimbo120410	22.532	22.9117	24.0472	31.5502	27.0679	28.4868	24.8582	25.7628	25.1686	24.3379	25.7216	31.423	25.3524
Gimbo120515	21.9631	22.5633	23.6512	31.3302	26.2681	28.1991	24.1837	25.1117	24.9081	24.0734	25.4641	32.3186	25.1771		Gimbo120515	0.412382	0.440234	0.297291	0.330155	0.450438	0.266868	0.441855	0.376799	0.261661	0.308968	0.271642	0.0725523	0.327907		Gimbo120515	21.9413	22.526	23.6126	31.3087	26.2722	28.134	24.1534	25.0794	24.9272	24.0543	25.4499	32.2569	25.1576
Gimbo120618	23.4396	23.6025	24.2222	32.6659	27.0394	28.8812	24.4295	26.2181	24.9181	24.0705	24.9763	32.4111	26.2655		Gimbo120618	0.150763	0.218982	0.20183	0.132423	0.263419	0.168949	0.374246	0.178048	0.259828	0.30959	0.37997	0.0681147	0.155601		Gimbo120618	23.393	23.5334	24.1713	32.6267	27.0462	28.7935	24.393	26.1609	24.9374	24.0514	24.9657	32.348	26.2331
Gimbo120807	21.9832	22.7058	22.7684	31.0835	25.9725	27.2272	23.6978	25.1334	24.1422	23.2223	24.076	31.6011	25.0482		Gimbo120807	0.406776	0.400025	0.540974	0.390834	0.553281	0.51192	0.613623	0.371312	0.447314	0.553689	0.705855	0.118348	0.358175		Gimbo120807	21.9611	22.6641	22.7489	31.0653	25.9755	27.1942	23.6796	25.1005	24.1536	23.2127	24.0722	31.551	25.0303
Gimbo120911	21.4246	22.286	22.8824	31.3747	25.1216	27.1355	23.4344	24.5455	23.7541	22.7678	24.1458	32.1127	25.3024		Gimbo120911	0.595239	0.530401	0.500731	0.320267	1	0.544358	0.733162	0.552999	0.586939	0.756082	0.672769	0.0834867	0.300945		Gimbo120911	21.4118	22.2572	22.8604	31.3526	25.1216	27.1055	23.4228	24.5259	23.7617	22.7632	24.1414	32.0544	25.2814
Gimbo130109	21.4793	22.0684	22.3848	29.7346	26.4664	27.0339	23.7648	24.5789	24.3205	23.6866	23.8229	30.4291	24.2661		Gimbo130109	0.573446	0.613903	0.701731	0.983278	0.392425	0.58272	0.586431	0.540631	0.39481	0.402773	0.84012	0.263225	0.611922		Gimbo130109	21.4657	22.0462	22.3735	29.7343	26.4711	27.0073	23.745	24.5585	24.3338	23.6718	23.821	30.3977	24.2576
Gimbo130204	21.6657	22.1892	22.362	30.5581	26.8722	27.1773	24.0364	24.7017	24.3799	23.7976	23.9004	30.1772	24.7214		Gimbo130204	0.505042	0.566044	0.712659	0.559837	0.295913	0.529324	0.488102	0.497455	0.378731	0.373263	0.796483	0.312557	0.448009		Gimbo130204	21.6489	22.1633	22.3512	30.5469	26.8784	27.1459	24.0098	24.6786	24.3938	23.7816	23.8979	30.1499	24.7074
Gimbo130313	22.375	22.3019	22.9552	31.3373	26.7116	27.4859	23.8652	24.808	24.7451	23.9554	24.1202	30.4778	25.0834		Gimbo130313	0.311452	0.524744	0.47661	0.328555	0.33089	0.430432	0.547987	0.462899	0.293285	0.335006	0.684693	0.254627	0.349629		Gimbo130313	22.3463	22.2726	22.9316	31.3157	26.7172	27.4443	23.8428	24.7825	24.7626	23.9376	24.1161	30.4456	25.0651
Gimbo130410	21.5516	22.0023	22.1998	30.4227	26.4057	26.9633	23.9244	24.7343	24.7459	23.7962	24.0748	30.058	24.27		Gimbo130410	0.545896	0.641782	0.795524	0.614153	0.409325	0.61096	0.526493	0.486607	0.29313	0.373639	0.706427	0.339031	0.610321		Gimbo130410	21.5367	21.9822	22.1925	30.4133	26.4103	26.939	23.9006	24.7104	24.7634	23.7801	24.071	30.0326	24.2613
Gimbo130515	21.6465	21.7704	22.2315	30.4095	25.936	26.869	23.4839	24.4162	24.5722	23.3616	23.8068	31.0363	24.2807		Gimbo130515	0.511682	0.750035	0.778636	0.619743	0.567497	0.650839	0.709054	0.603628	0.331027	0.503268	0.849481	0.173962	0.605834		Gimbo130515	21.6301	21.7573	22.2235	30.4002	25.9389	26.8478	23.4711	24.3995	24.588	23.3505	23.805	30.9952	24.272
min	20.6634	21.3423	21.8625	29.7099	25.1216	26.2282	22.975	23.6712	22.993	22.3599	23.5696	28.4721	23.549																		ACTB	B2M	GAPDH	HPRT1	LDHB	PGK1	RPL18	RPL4	RPL8	RPS18	RPS9	TFRC	YWHAZ
min值	20.6634	21.3423	21.8625	29.7099	25.1216	26.2282	22.975	23.6712	22.993	22.3599	23.5696	28.4721	23.549																	ave	22.076	22.3501	23.3704	31.4775	26.5909	27.6176	24.0871	24.9184	24.3022	23.6813	24.7426	30.8187	25.1781
																														max	23.9256	23.5334	26.4419	33.9886	28.1191	29.0198	25.6396	26.4514	25.4896	24.7073	26.8057	33.5508	27.5931
																														min	20.6634	21.3423	21.8625	29.7099	25.1216	26.2282	22.975	23.6712	22.993	22.3599	23.5696	28.4721	23.549
																														max-ave	1.84965	1.18328	3.07154	2.51116	1.52821	1.40224	1.55246	1.533	1.18738	1.02597	2.06312	2.73214	2.41503
																														av-min	1.41257	1.00784	1.50789	1.76755	1.46927	1.38942	1.11205	1.24715	1.30917	1.32145	1.17298	2.34659	1.62913
